# Supplementary material
Source: MDPI journal article supplement (https://www.mdpi.com/2075-163X/10/6/561)
Supplement: s1 [file s1]

## Supplementary material

### A highly selective reagent scheme for scheelite flotation: polyaspartic acid and Pb-BHA complexes

Zhao Wei<sup>#1,2</sup>, Junhao Fu<sup>#1,2</sup>, Haisheng Han<sup>\*1,2,3</sup>, Wei Sun<sup>1,2</sup>, Tong Yue<sup>\*1,2</sup>, Li Wang<sup>1,2</sup>, Lei Sun<sup>1,2</sup>

1. School of Minerals Processing and Bioengineering, Central South University, Changsha 410083, China

2. Key Laboratory of Hunan Province for Clean and Efficient Utilization of Strategic Calcium-containing Mineral Resources, Central South University, Changsha 410083, China

3. BGRIMM Technology Group, Beijing, 100160, China

<sup>#</sup>These authors contributed equally to this manuscript

<sup>\*</sup>Corresponding author. hanhai5086@csu.edu.cn (H. Han), yuetong@csu.edu.cn (Tong Yue)

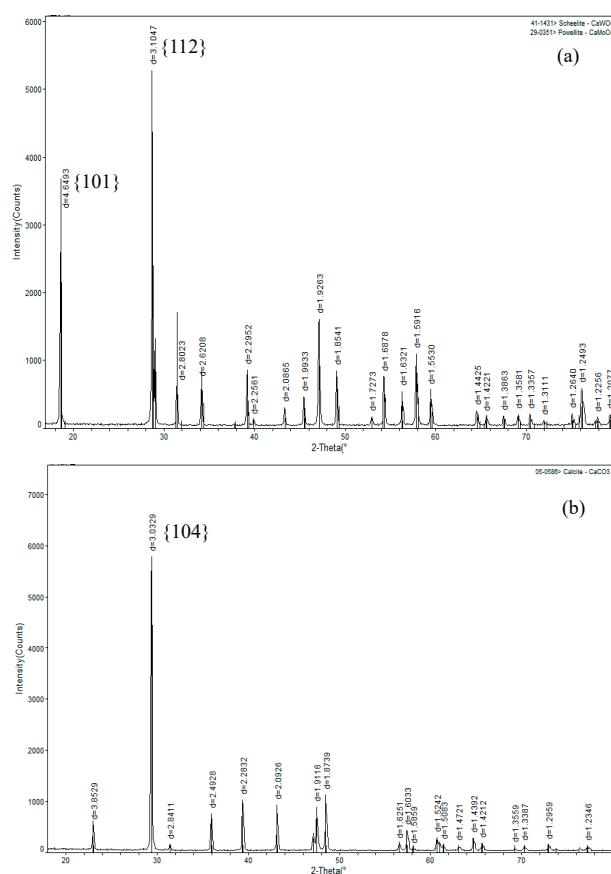

Figure S1 XRD of pure scheelite (a) and calcite (b)

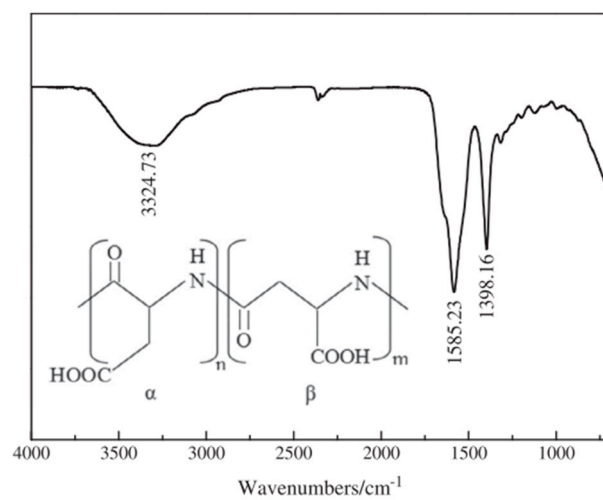

Figure S2. Infrared spectra of PASP
